# Supplementary material
Source: MDPI journal article supplement (https://www.mdpi.com/2071-1050/12/3/962)
Supplement: s1 [file s1]

# 1   **Supplementary information on the construction of the energy extension** 2   **vector**

3   To article “Structural Change for a Post-growth Economy: Investigating the relationship between embodied  
4   energy intensity and labour productivity” in *Sustainability*  
5   Lukas Hardt, Peter Taylor, John Barrett, Timothy Foxon  
6   School of Earth and Environment, University of Leeds  
7

## 8   **1   Introduction**

9   For our study we construct a global extension vector for EXIOBASE specifying final energy consumption  
10   across sectors and regions. We construct this vector in two steps. In the first step we use data on final energy  
11   consumption provided by the International Energy Agency (IEA) in combination with information on monetary  
12   output and expenditure from EXIOBASE to construct a complete vector for all countries and regions outside  
13   Germany and the UK (described in section 2). In a second step we use national data sources to construct  
14   more detailed vectors of energy inputs for the UK and Germany respectively (described in sections 3 and 4).

## 15   **2   Global energy extension vector**

### 16   **2.1   Data sources**

17   We construct the vector of energy inputs to match the data on monetary flows from the EXIOBASE database.  
18   We use the symmetric input-output tables of EXIOBASE version 3.4. The EXIOBASE 3.4 database is available  
19   at <http://exiobase.eu/index.php/data-download/exiobase3mon>. The database covers the period from 1995 to  
20   2011 and represents the global economy in 44 countries and 5 rest-of-the-world regions. Each  
21   national/regional economy is disaggregated into 163 sectors based on NACE rev.1.1 classification. However,  
22   for our purposes we aggregate the database to a level of 70 sectors, largely by removing detailed sub-  
23   classifications in the sectors of agriculture, food production, metal mining and processing and recycling. We  
24   perform this aggregation to 70 sectors because our energy data does not provide a similar level of detail and  
25   it simplifies computation and analysis (Table S1). The term “EXIOBASE sectors” will be used from hereafter  
26   to describe the 70 aggregated sectors and sector numbers will refer to the numbers in Table S1, ranging from  
27   1 to 70.

28   For the construction of the energy extension vector we draw on data from the Extended World Energy Balances  
29   provided by the International Energy Agency (IEA, 2018) to produce information on the final energy inputs for  
30   each sector and each country/region in EXIOBASE. However, the energy inputs for the UK and Germany are  
31   later replaced by more detailed information from domestic sources. The energy balances provide details on  
32   the energy production, transformation and use in more than 140 countries.

| No | Sector                                                                        | NACE<br>1.1     | No | Sector                                                        | NACE<br>1.1     |
|----|-------------------------------------------------------------------------------|-----------------|----|---------------------------------------------------------------|-----------------|
| 1  | Agriculture                                                                   | 01              | 36 | Production of electricity from nuclear power                  | 40.11           |
| 2  | Forestry                                                                      | 02              | 37 | Production of electricity from renewables and other sources   | 40.11           |
| 3  | Fishing                                                                       | 05              | 38 | Transmission and distribution of electricity                  | 40.12,<br>40.13 |
| 4  | Mining of coal and lignite                                                    | 10              | 39 | Manufacture and distribution of gas                           | 40.2            |
| 5  | Extraction of crude petroleum and nat. gas                                    | 11              | 40 | Steam and hot water supply                                    | 40.3            |
| 6  | Other mining and quarrying                                                    | 12-14           | 41 | Water collection, purification and distribution               | 41              |
| 7  | Manufacture of food products                                                  | 15.1-8          | 42 | Construction                                                  | 45              |
| 8  | Manufacture of beverages                                                      | 15.9            | 43 | Sale, maintenance, repair of motor vehicles                   | 50              |
| 9  | Manufacture of tobacco products                                               | 16              | 44 | Wholesale and commission trade                                | 51              |
| 10 | Manufacture of textiles                                                       | 17              | 45 | Retail trade                                                  | 52              |
| 11 | Manufacture of clothes                                                        | 18              | 46 | Hotels and restaurants                                        | 55              |
| 12 | Manufacture of leather products                                               | 19              | 47 | Transport via railways                                        | 60.1            |
| 13 | Manufacture of wood products                                                  | 20              | 48 | Other land transport                                          | 60.2            |
| 14 | Manufacture of paper and paper products                                       | 21              | 49 | Transport via pipelines                                       | 60.3            |
| 15 | Publishing, printing and reproduction of recorded media                       | 22              | 50 | Water transport                                               | 61              |
| 16 | Manufacture of coke oven products                                             | 23.1            | 51 | Air transport                                                 | 62              |
| 17 | Petroleum refinery                                                            | 23.2            | 52 | Supporting and auxiliary transport activities                 | 63              |
| 18 | Processing of nuclear fuel                                                    | 23.3            | 53 | Post and telecommunications                                   | 64              |
| 19 | Manufacture of chemicals                                                      | 24              | 54 | Financial intermediation except insurance                     | 65              |
| 20 | Manufacture of rubber and plastic products                                    | 25              | 55 | Insurance and pension funding                                 | 66              |
| 21 | Manufacture of non-metallic minerals                                          | 26              | 56 | Activities auxiliary to financial intermediation              | 67              |
| 22 | Manufacture of basic iron and steel                                           | 27.1-3,<br>27.5 | 57 | Real estate activities                                        | 70              |
| 23 | Manufacture of non-ferrous metals                                             | 27.4            | 58 | Renting of machinery and equipment                            | 71              |
| 24 | Manufacture of fabricated metal products                                      | 28              | 59 | Computer and related activities                               | 72              |
| 25 | Manufacture of machinery and equipment nec                                    | 29              | 60 | Research and development                                      | 73              |
| 26 | Manufacture of office machinery and computers                                 | 30              | 61 | Other business activities                                     | 74              |
| 27 | Manufacture of electrical machinery and apparatus nec                         | 31              | 62 | Public administration and defence; compulsory social security | 75              |
| 28 | Manufacture of radio, television and communication equipment and apparatus    | 32              | 63 | Education                                                     | 80              |
| 29 | Manufacture of medical, precision and optical instruments, watches and clocks | 33              | 64 | Health and social work                                        | 85              |
| 30 | Manufacture of motor vehicles, trailers and semi-trailers                     | 34              | 65 | Sewage and refuse disposal                                    | 90              |
| 31 | Manufacture of other transport equipment                                      | 35              | 66 | Activities of membership organisation nec                     | 91              |
| 32 | Manufacture of furniture; manufacturing nec                                   | 36              | 67 | Recreational, cultural and sporting activities                | 92              |
| 33 | Recycling                                                                     | 37              | 68 | Other service activities                                      | 93              |
| 34 | Production of electricity from coal                                           | 40.11           | 69 | Private households with employed persons                      | 95              |
| 35 | Production of electricity from gas                                            | 40.11           | 70 | Extra-territorial organizations and bodies                    | 99              |

34 Given that we are only interested in final energy data, we only use the information on Total Final Consumption  
35 (TFC) in the energy balances, which is subdivided into 27 energy flows (Table S2). We download the data for  
36 the 27 flows for all countries available in the energy balances and aggregate the data of individual countries  
37 to the 49 countries/regions used in EXIOBASE. We then exclude the two flows of non-energy use and  
38 residential energy consumption, because our study focuses on energy inputs into economic production. This  
39 leaves us with the relevant final energy consumption in each EXIOBASE country/region disaggregated into 25  
40 IEA flows.

41 In the following we describe how we map the 25 IEA flows onto the 70 EXIOBASE sectors.

## 42 2.2 Industry

43 Table S2 describes how the 13 industry-related energy flows were mapped onto the relevant 25 industry and  
44 construction sectors in EXIOBASE (6-15,19-33,41-42 in Table S1). IEA Flows that only correspond to one  
45 EXIOBASE sector are directly assigned to that sector. IEA flows that correspond to multiple EXIOBASE sectors  
46 are split in proportion with the total monetary expenditure on energy in each sector. The expenditure on energy  
47 of each sector was obtained by summing the intermediate expenditures on the energy-producing sectors (4-  
48 5,16-18,34-40 in Table S1) from the EXIOBASE tables.

49 We used expenditure on energy rather than total sectoral output for splitting the IEA flows, because a  
50 comparison of the results of both methods for the UK revealed that the energy expenditure approach produced  
51 results that better matched the more detailed information available from domestic data UK sources.

52 The IEA flow of “non-specified industry” includes both the energy use in industry sectors that are not covered  
53 by the other industry flows, as well as any energy use that cannot be allocated to a specific industry due to  
54 lack of information. We allocate this flow only to the EXIOBASE industry sectors that are not covered by the  
55 other IEA flows (i.e. sectors 25, 32,33,41 in Table S1) in proportion to the energy expenditure in these sectors.

## 56 2.3 Transport

### 57 2.3.1 Rail, pipeline and non-specified transport

58 The IEA energy flows for rail and pipeline transport are directly assigned to the respective EXIOBASE sectors.  
59 The IEA flow of “non-specified (transport)” is allocated across all transport sectors in proportion to economic  
60 output in the sectors.

### 61 2.3.2 Road transport

62 The treatment of the IEA energy flow for road transport is more difficult and poses several challenges. Firstly,  
63 it includes the energy used by private households, which we have to exclude for our analysis, as we are only  
64 interested in energy used for commercial purposes. Information on the share of non-commercial road transport  
65 energy use in total road transport energy use is not available in a single consistent database.

66

67 **Table S2:** IEA energy flows from TFC and corresponding EXIOBASE sectors (sector numbers refer to Table S1).

| IEA TFC flow                   | EXIOBASE sectors      | Method for allocation       |
|--------------------------------|-----------------------|-----------------------------|
| <b>Industry</b>                |                       |                             |
| Iron and steel                 | 22,24                 | EXIOBASE energy expenditure |
| Chemical and petrochemical     | 19                    | Direct                      |
| Non-ferrous metals             | 23                    | Direct                      |
| Non-metallic minerals          | 21                    | Direct                      |
| Transport equipment            | 30-31                 | EXIOBASE energy expenditure |
| Machinery                      | 25-29                 | EXIOBASE energy expenditure |
| Mining and quarrying           | 6                     | Direct                      |
| Food and tobacco               | 7-9                   | EXIOBASE energy expenditure |
| Paper, pulp and print          | 14,15                 | EXIOBASE energy expenditure |
| Wood and wood products         | 13                    | Direct                      |
| Construction                   | 42                    | Direct                      |
| Textile and leather            | 10-12                 | EXIOBASE energy expenditure |
| Non-specified (industry)       | 25,32-33,41           | EXIOBASE energy expenditure |
| <b>Transport</b>               |                       |                             |
| Domestic aviation              | 51                    | See details in text         |
| Road                           | 48                    | See details in text         |
| Rail                           | 47                    | Direct                      |
| Pipeline transport             | 49                    | Direct                      |
| Domestic navigation            | 50                    | See details in text         |
| Non-specified (transport)      | 47-51                 | See details in text         |
| World aviation bunkers         | 51                    | See details in text         |
| World marine bunkers           | 50                    | See details in text         |
| <b>Other</b>                   |                       |                             |
| Commercial and public services | 43-46, 52-68          | EXIOBASE output             |
| Agriculture/forestry           | 1-2                   | EXIOBASE output             |
| Fishing                        | 3                     | Direct                      |
| Non-specified (other)          | 1-3,6-15,19-33, 41-68 | See details in text         |
| <b>Excluded flows</b>          |                       |                             |
| Residential                    | -                     | -                           |
| Non-energy use                 | -                     | -                           |

68  
69 Therefore we rely on different data sources to obtain the necessary information. For those countries that  
70 publish greenhouse gas (GHG) inventories under the UNFCCC, we use the share CO<sub>2</sub> emissions produced  
71 by cars in the total road transport CO<sub>2</sub> emissions as a proxy for the share of non-commercial road transport  
72 energy use. For all remaining countries we tried to obtain estimates from the academic literature or from other  
73 statistical sources. Where such sources were not available, we used the shares obtained for different countries

74 that we considered to be sufficiently similar. For the rest-of-the-world regions we obtained the information for  
75 a single country in the region as an estimate for the share of non-commercial transport in the whole region.

76 Secondly, IEA energy balances are assembled based on a territorial principle, while national economic  
77 accounts and EXIOBASE follow a residency principle (Stadler *et al.*, 2018). This is particularly problematic for  
78 the transport sector. In the IEA balances, transport energy use is recorded where the fuel is used (or sold), no  
79 matter whether the company (or person) using the fuel is resident in the country. In contrast the economic  
80 activity is recorded in the country of residency of the company or person. This means that ideally the figures  
81 for road transport energy use provided by the IEA need to be adjusted for energy used by foreign vehicles in  
82 the country and the energy used by domestic vehicles outside the country. However, such information is not  
83 easily obtained and detailed modelling would be beyond the constraints of this study. We therefore do not  
84 perform any adjustments of this nature, essentially assuming that energy use by domestic vehicles abroad is  
85 similar to energy use by foreign vehicles domestically. This is not the case in many countries and this  
86 assumptions therefore adds to the uncertainty of this analysis. However, we consider it unlikely that taking into  
87 account such adjustments in road transport would significantly alter our overarching conclusions.

88 Thirdly, once the total energy use for commercial road transport is estimated, this figure cannot simply be  
89 allocated to the EXIOBASE sector for road transport, which only captures the logistics sector. Instead the IEA  
90 data captures all road energy by commercial vehicles, many of which are directly operated by companies in  
91 sectors outside logistics, for example supermarket distribution lorries. The data on commercial road transport  
92 energy use therefore needs to be split and allocated across a range of economic sector. The only country for  
93 which we found information of this nature is Germany for the years 1995 to 2001 (see section 3). Therefore  
94 we use the German data to estimate the allocation of commercial road transport energy use across the  
95 EXIOBASE sectors for all other countries/regions. We achieve this in three steps. Firstly, we obtain the German  
96 road transport intensity of each sector by dividing sectoral road transport energy use by industry sector output  
97 from EXIOBASE. As the intensities are relatively stable, we obtain the average German intensities over the  
98 seven years provided to apply them to all other countries and years. Secondly, we multiply the average  
99 Germany road transport energy intensities for each sector with total output in each sector and each year in the  
100 other countries. Thirdly, we scale these results in each country so that the sectoral road transport energy use  
101 adds up to the total energy use for commercial road transport in the country.

### 102 2.3.3 Aviation and marine transport

103 The energy use of internal aviation and marine transport (i.e. international marine and aviation bunkers) pose  
104 similar challenges to road transport, again due to the fact that the IEA data is reported based on the territorial  
105 principle while EXIOBASE is built on the residency principle. A detailed modelling of aviation and marine trade  
106 flows to allocate international bunkers to the right countries is, again, beyond the constraints of this study.

107 For simplicity we therefore assumed that the aviation sectors across all countries/regions have the same  
108 energy intensity of output set to the global average. The economic output of the aviation sector in EXIOBASE  
109 does not distinguish between domestic and international aviation, as the IEA data does. To obtain the global  
110 average intensity we therefore add international aviation bunkers and energy use for domestic aviation across  
111 all countries to obtain the total global energy use for aviation. We then divide the total aviation energy use by  
112 the sum of economic output in the aviation industries across all countries/regions in EXIOBASE to obtain the

113 global average energy intensity. The global aviation energy use is then reallocated to the aviation industries in  
114 the individual countries based on their economic output and the average global intensity. For marine transport  
115 energy use we adopt the same process.

116 Our process of allocation therefore relies on very simplified assumptions, but we considered that they represent  
117 the best possible solution within the constraints of this study. Aviation and marine transport each make up  
118 about 5% of commercial global final energy consumption in 2011 (i.e. excluding residential, private transport  
119 and non-energy use). The assumptions therefore add a degree of uncertainty to our results.

## 120 2.4 Other flows

121 Of the remaining flows, the energy use for fishing and construction are assigned directly to the respective  
122 EXIOBASE sectors. The agriculture/forestry flow in the IEA balances was split according to sector output as  
123 reported in EXIOBASE.

124 The IEA extended energy balances only feature a single flow describing all final energy consumption in the  
125 commercial and public service sectors. We split this flow into the relevant EXIOBASE sectors (43-46, 52-68 in  
126 Table S1) in proportion to the total output in these sectors as reported in EXIOBASE. In contrast to the industry  
127 sectors, we use total output and not energy expenditure for the service sectors because the energy expenditure  
128 approach produces unrealistically low values of energy consumption in some sectors.

129 Finally, the energy balances include a flow labelled as “Non-specified (other)” which includes all energy use  
130 that is not assigned to other categories (including for military use). Values for this category are mostly between  
131 0 and 2% of overall final energy use (excl. non-energy use) for most countries/regions but can reach higher  
132 values (up to 10%) in some years and some countries/regions. The category is therefore non-negligible but  
133 there is no information on what the energy is used for. In the absence of better information we distribute the  
134 flow across all energy-using sectors in proportion to sectoral output.

## 135 2.5 Sectors without final energy consumption

136 Some of the 70 EXIOBASE sectors were not assigned any final energy use from the IEA flows. This includes  
137 those sectors that produce primary energy carriers (e.g. coal mining) or transform them into final energy  
138 carriers (e.g. electricity production). By definition, these sectors (4-5,16-18,34-40 in Table S1) are not users of  
139 final energy and therefore do not feature a final energy consumption in the IEA balances. In addition we also  
140 did not assign any final energy consumption to the sectors “Private Households with Employed Persons”,  
141 because we consider that the sector does not have energy use separate from private residential use. We didn’t  
142 assign any energy consumption to the sector “Extraterritorial bodies and organisations” as this sector does not  
143 feature any monetary flows in EXIOBASE.

144

### 145 3 Energy extension vector for the UK

146 In our study we focus on the energy and labour footprint of final demand in the UK or Germany. To reduce  
147 some of the uncertainty associated with the IEA data, we construct more detailed extension vectors for these  
148 two countries drawing on domestic data sources describing energy use.

#### 149 3.1 Data sources

150 For the UK we make extensive use of the 2018 version of the Energy Consumption in the UK (ECUK) dataset,  
151 published by the Department for Business, Energy and Industrial Strategy (BEIS, 2018). This was  
152 complemented by monetary flows from the EXIOBASE database if necessary.

#### 153 3.2 Industry

154 For industry sectors, the ECUK dataset provides data on energy consumption at the 2-digit level of the SIC2003  
155 classification. This classification mostly matches the industry and construction EXIOBASE sectors (6-15,19-  
156 33,41-42 in Table S1). The only exception is the aggregated food and beverages sector which we split into  
157 food and beverages according to EXIOBASE energy expenditure. For the years 2010 and 2011 the ECUK  
158 database provides data in SIC2007 classification (corresponds to NACE rev. 2) which we transformed into  
159 NACE rev1.1 classification to match our EXIOBASE sectors.

160 The industrial energy use listed as “unclassified” in ECUK provides a difficult choice for allocation. We decided  
161 to add it to the sector “Manufacture of furniture; manufacturing nec” because the sectors featured unrealistically  
162 low values of energy intensity otherwise. However, some of the unclassified energy are also likely to be used  
163 in other sectors. As a result our estimates of embodied energy intensity for the sector “Manufacture of furniture;  
164 manufacturing nec” is an overestimate, while the intensities in the other manufacturing sectors are  
165 underestimated.

#### 166 3.3 Transport

167 We do not recalculate energy use for marine transport and aviation for the UK but instead take it from the  
168 global extension vectors (described in section 1.3) to make sure that it is consistent with our global  
169 assumptions.

170 The ECUK dataset provides separate information on road transport energy use for passenger and freight  
171 transport as well as for different transport modes. This allows an estimation of the commercial road transport  
172 energy use. However, there is no information provided on the sectors in which the transport energy is used.  
173 We therefore estimate the allocation of road transport energy use to EXIOBASE sectors using the German  
174 data as described in section 1.3.

175 Data on rail transport energy use is provided in the ECUK. We obtain energy use for pipeline transport (which  
176 is very small in the UK) from the IEA data, as no information is provided in ECUK.

### 3.4 Other energy users

The ECUK dataset provides information on the aggregate energy use for the sectors agriculture, forestry and fishing. We split this energy use according to sector proportions in EXIOBASE output to obtain the energy use in the three individual sectors.

For the commercial and public service sectors the ECUK dataset provides the aggregate energy use for all years covered in this study as well as a more detailed breakdown for the years 2010 and 2011. Table S3 describes the sub-categories for which data is provided in 2010 and 2011 and the EXIOBASE sectors we assigned to these sub-categories. We estimate the energy consumption in each sub-category for the years 1995-2009 from the data for 2010/2011 using the following steps. Firstly, we obtain the total economic output for each sub-category by summing the output of the relevant sectors from EXIOBASE. Secondly, we use the output figures to calculate the average energy intensity of output in each subcategory for the years 2010 to 2011. Thirdly, we multiply the average energy intensity with the economic output in the sub-categories for the years 1995-2009. Finally, we scale these results so that the sum of energy use in all sub-categories matches the aggregate energy use in the services sectors reported. In essence this process assumes that the relative energy intensities in the sub-categories stay constant at their 2010/2011 value for the whole time period.

Once we have obtained the energy use in each sub-category and each year, the sub-categories are allocated to the relevant EXIOBASE sector in proportion to EXIOBASE sector output (Table S3).

**Table S3:** ECUK energy use in service sector sub-categories and corresponding EXIOBASE sectors (sector numbers refer to Table S1).

| ECUK service sector sub-category | EXIOBASE sectors | Method for allocation |
|----------------------------------|------------------|-----------------------|
| Commercial offices               | 54-61            | EXIOBASE output       |
| Communication and transport      | 52-53            | EXIOBASE output       |
| Education                        | 63               | Direct                |
| Government                       | 62               | Direct                |
| Health                           | 64               | Direct                |
| Hotel and Catering               | 46               | Direct                |
| Other                            | 65-66, 68        | Direct                |
| Retail and warehouses            | 43-45            | EXIOBASE output       |
| Sport and Leisure                | 67               | Direct                |

196

## 4 Energy extension vector for Germany

### 4.1 Data sources

To create a more detailed extension vector for Germany we draw on three important data sources. To obtain energy use in the industrial sectors as well as aggregate energy use in commercial and public services we use the data provided in the German energy balances (AG Energiebilanzen, 2019). In addition, we use statistical



reports on energy use in the sector “Gewerbe, Handel, Dienstleistungen” (GHD), which provides detailed estimates of energy use in the non-industrial and non-transport sectors for the year 1994 (Geiger, Gruber and Megele, 1999) and the years 2001-2011 (Schlomann *et al.*, 2004, 2009, 2013). In combination these reports will be referred to as GHD reports hereafter. Finally, the Berichtsmodul Verkehr und Umwelt (Adler, 2005) provides information on the transport energy use allocated to different sectors for the years 1995 to 2001.

## 4.2 Industry

We obtain information on energy use in industry for the years 1995 to 2011 from the Germany energy balances. Table S4 outlines the energy flows provided in the balances and the EXIOBASE sectors to which we allocate them. As the disaggregation in the energy balances is less detailed than in our EXIOBASE sectors, we allocate the energy use to the relevant EXIOBASE in proportion to EXIOBASE energy expenditure. Contrary to the IEA and UK energy data, the construction and water sectors are not treated as part of the industrial sectors. They are instead allocated to the GHD category treated in the reports mentioned above.

**Table S4:** Energy use in the industrial sectors from German energy balances and corresponding EXIOBASE sectors (numbers refer to Table S1).

| German energy balance flow                          | EXIOBASE sectors | Method for allocation       |
|-----------------------------------------------------|------------------|-----------------------------|
| Gewinnung von Steinen und Erden, sonst. Bergbau     | 6                | Direct                      |
| Ernährung und Tabak                                 | 7-9              | EXIOBASE energy expenditure |
| Papiergewerbe                                       | 14               | Direct                      |
| Grundstoffchemie and Sonstige chemische Industrie   | 19               | Direct                      |
| Gummi- u. Kunststoffwaren                           | 20               | Direct                      |
| Glas u. Keramik and Verarbeitung v. Steine u. Erden | 21               | Direct                      |
| Metallerzeugung                                     | 22               | Direct                      |
| NE-Metalle, -gießereien                             | 23               | Direct                      |
| Metallbearbeitung                                   | 24               | Direct                      |
| Maschinenbau                                        | 25-29            | EXIOBASE energy expenditure |
| Fahrzeugbau                                         | 30-31            | EXIOBASE energy expenditure |
| Sonstige Wirtschaftszweige                          | 10-12,15,32-33   | EXIOBASE energy expenditure |

## 4.3 Transport

We do not recalculate energy use for marine transport and aviation for Germany but instead take it from the global extension vectors (described in section 1.3) to make sure that it is consistent with our global assumptions.

The German energy balances provide information on the total road transport energy use in Germany. We obtained estimates of the proportion of commercial road transport energy for the years 1994 to 2001 from Adler (2005) and for the year 2016 from Statistisches Bundesamt (2018). We obtain the value of the proportion

223 of commercial road transport energy use for the years 2002 – 2011 using linear interpolation and use the  
 224 values to estimate total commercial road transport energy use for the whole time period covered in this study.

225 Adler (2005) also gives the allocation of road transport energy use to different economic sectors for the years  
 226 1994 to 2001. The sector shares in transport energy use remain relatively stable. Therefore we assume  
 227 constant sector shares for the years 2002 to 2011, set to the values for 2001, and use these shares to estimate  
 228 sectoral transport energy use from total commercial road transport energy use. The resulting values are then  
 229 aggregated to EXIOBASE sectors and the energy use added to non-transport forms of energy use in the  
 230 sectors.

231 Data on rail transport energy use is provided in the German energy balances. We obtain energy use for pipeline  
 232 transport from the IEA data, as no information is provided in the German energy balances.

## 233 4.4 Other flows

234 In the German energy balances all other flows are covered in a single category labelled “Gewerbe, Handel,  
 235 Dienstleistungen” (GHD). The GHD reports provide a more detailed investigation of energy use split into 37  
 236 different sub-sectors for the years 1994 (Geiger, Gruber and Megele, 1999) and 2001-2011 (Schlommann *et al.*,  
 237 2004, 2009, 2013) in a mostly consistent format. Sectoral energy use for the 37 sectors and years 1995 to  
 238 2000 was obtained using linear interpolation. The GHD reports produce results that are not completely  
 239 consistent with the total GHD energy use reported in the energy balances, although differences between the  
 240 totals are small. To make the energy extension for Germany as consistent as possible with the German energy  
 241 balances, we scale the sectoral energy use in the GHD reports to match the total GHD use in the energy  
 242 balances.

243 We then transform the energy use in the 37 GHD sectors for the years 1995 to 2011 into the relevant  
 244 EXIOBASE sectors. Where energy use had to be split from one GHD category into multiple EXIOBASE sectors  
 245 we allocated the energy use in proportion to EXIOBASE output. The GHD category mostly covers the non-  
 246 transport public and commercial service sectors (41, 43-46, 52-68 in Table S1), as well as construction (42)  
 247 and agriculture, forestry and fishing (1-3). However, it also contains small amounts of energy use in small  
 248 enterprises (less than 20 employees) in the industry sectors (e.g. artisan bakeries), as well as some energy  
 249 use that is used in the transport sector for non-transport purposes (e.g. energy use in airports).

## 250 References

- 251 Adler, W. (2005) *Berichtsmodul Verkehr und Umwelt: Band 14 der Schriftenreihe Beiträge zu den*  
 252 *Umweltökonomischen Gesamtrechnungen*. Wiesbaden: Statistisches Bundesamt.
- 253 AG Energiebilanzen (2019) *Bilanzen 1990-2017*. Available at: [https://ag-energiebilanzen.de/7-0-Bilanzen-](https://ag-energiebilanzen.de/7-0-Bilanzen-1990-2017.html)  
 254 [1990-2017.html](https://ag-energiebilanzen.de/7-0-Bilanzen-1990-2017.html) (Accessed: 7 February 2019).
- 255 BEIS (2018) ‘Energy Consumption in the UK 2018’. Available at:  
 256 <https://www.gov.uk/government/statistics/energy-consumption-in-the-uk>.
- 257 Geiger, B., Gruber, E. and Megele, W. (1999) *Energieverbrauch und Einsparung in Gewerbe, Handel und*

258 *Dienstleistung*. Berlin, Heidelberg: Springer Verlag.

259 IEA (2018) 'World Energy Balances: Database Documentation (2018 Edition)'. Available at:  
 260 [http://wds.iea.org/wds/pdf/WORLDBAL\\_Documentation.pdf](http://wds.iea.org/wds/pdf/WORLDBAL_Documentation.pdf).

261 Schlomann, B. *et al.* (2004) 'Energieverbrauch der privaten Haushalte und des Sektors Gewerbe, Handel,  
 262 Dienstleistungen (GHD)', *Abschlussbericht an das Bundesministerium für Wirtschaft und Arbeit*.

263 Schlomann, B. *et al.* (2009) 'Energieverbrauch des Sektors Gewerbe, Handel, Dienstleistungen (GHD) für die  
 264 Jahre 2004 bis 2006', *Abschlussbericht an das Bundesministerium für Wirtschaft und Technologie (BMWi) und*  
 265 *an das Bundesministerium für Umwelt, Naturschutz und Reaktorsicherheit (BMU)*.

266 Schlomann, B. *et al.* (2013) 'Energieverbrauch des Sektors Gewerbe, Handel, Dienstleistungen (GHD) in  
 267 Deutschland für die Jahre 2007 bis 2010', *Endbericht and das Bundesministerium für Wirtschaft und*  
 268 *Technologie (BMWi)*.

269 Stadler, K. *et al.* (2018) 'EXIOBASE 3: Developing a Time Series of Detailed Environmentally Extended Multi-  
 270 Regional Input-Output Tables', *Journal of Industrial Ecology*, 22(3). doi: 10.1111/jiec.12715.

271 Statistisches Bundesamt (Destatis) (2018) 'Umweltökonomische Gesamtrechnungen: Transportleistungen  
 272 und Energieverbrauch im Straßenverkehr 2005 – 2016'.

273

274

275
